# Supplementary material
Source: publisher figshare collection journal article supplement (https://gsapubs.figshare.com/articles/dataset/_/12532895)

**Supplemental information, Figure DR1 (thermomagnetic curves of representative specimens)**

Method of the thermomagnetic measurements: Magnetic susceptibility was measured as a function of temperature using an Agico MFK1-FA Kappabridge connected to a CS4 Furnace in the Laboratory of Rock Magnetism, Institute of Geology and Paleontology, Charles University in Prague. Specimens were heated up in argon atmosphere (to minimize mineral changes due to oxidation) from the room temperature to 700 °C and cooled back at an approximate rate of 14 °C/min. Magnetic susceptibility was measured approximately every minute. The resulting thermomagnetic curves show hyperbolic decrease in susceptibility with temperature, typical of paramagnetic minerals (specimen JZ27/2/1) or an abrupt susceptibility drop near the Curie temperature of magnetite (specimen JZ38/1/2).

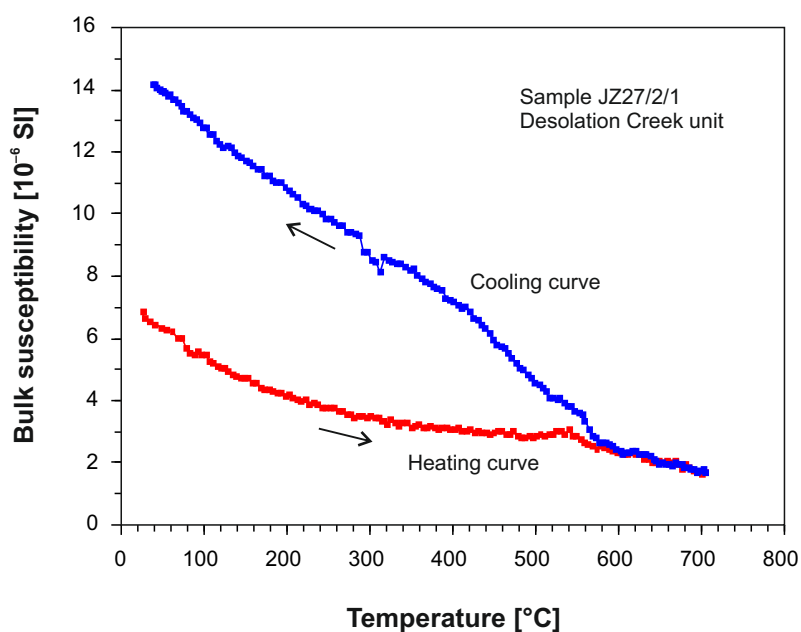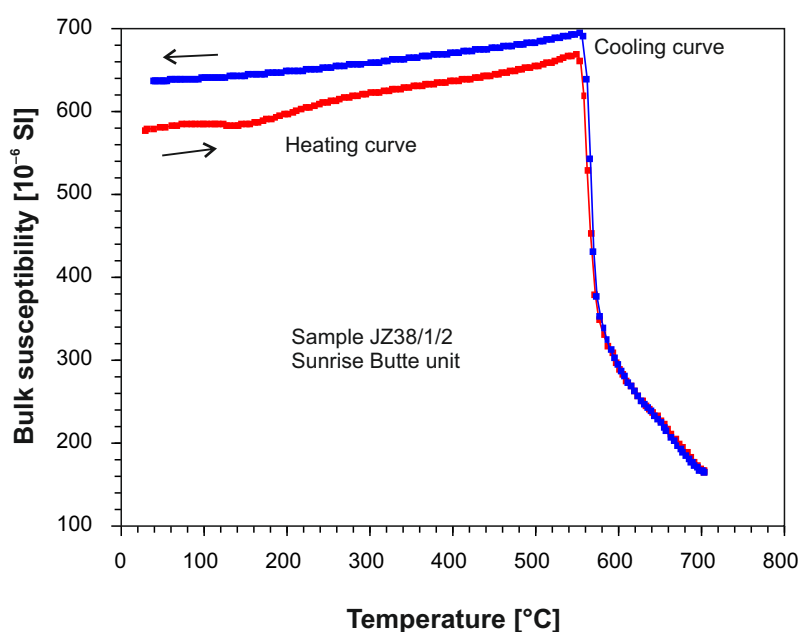

Supplement: Supplementary file 1 [file 1]
